# Supplementary material
Source: PubMed Central journal article supplement (PMC10993294)
Supplement: NIHMS1915887-supplement-Appendix.pdf [file NIHMS1915887-supplement-Appendix.pdf]

**Appendix: Informal modes of social support among residents of the rural American West during the COVID-19 pandemic**

## Supplementary Tables

Table A1: Demographics of Sample and Target Population

| Variable                        | Total Responses | Unweighted Sample % | Weighted Sample % | Nonmetro West Population % |
|---------------------------------|-----------------|---------------------|-------------------|----------------------------|
| <b>Age</b>                      |                 |                     |                   |                            |
| 18-34                           | 84              | 8.3                 | 21.4              | 19.4                       |
| 35-49                           | 200             | 19.8                | 28.6              | 16.5                       |
| 50-64                           | 281             | 27.8                | 28.6              | 21.7                       |
| 65+                             | 409             | 40.5                | 20.4              | 20.1                       |
| <b>Sex</b>                      |                 |                     |                   |                            |
| Male                            | 481             | 47.7                | 50.0              | 49.2                       |
| Female                          | 507             | 50.2                | 48.0              | 50.8                       |
| <b>Ethnicity</b>                |                 |                     |                   |                            |
| Latino/a                        | 71              | 7.0                 | 14.7              | 18.1                       |
| Not Latino/a                    | 895             | 88.7                | 81.1              | 82.0                       |
| <b>Race</b>                     |                 |                     |                   |                            |
| White                           | 837             | 83.0                | 78.0              | 84.6                       |
| Black or African American       | 2               | 0.2                 | 0.1               | 1.0                        |
| Asian                           | 2               | 0.2                 | 0.1               | 1.1                        |
| Native American                 | 23              | 2.3                 | 4.0               | 6.2                        |
| Hawaiian or Pacific Islander    | 2               | 0.2                 | 0.2               | 0.1                        |
| Mixed Race                      | 37              | 3.7                 | 5.3               | 3.1                        |
| Other                           | 48              | 4.8                 | 6.7               | 3.8                        |
| <b>Education</b>                |                 |                     |                   |                            |
| Less than high school           | 17              | 1.7                 | 2.5               | 11.7                       |
| High school or GED              | 159             | 15.8                | 24.2              | 28.7                       |
| Some college                    | 251             | 24.9                | 38.5              | 26.2                       |
| Bachelors or Associates         | 331             | 32.8                | 21.5              | 24.9                       |
| Graduate or Professional Degree | 239             | 23.7                | 12.9              | 8.5                        |
| <b>State</b>                    |                 |                     |                   |                            |
| Arizona                         | 34              | 3.4                 | 5.0               | 5.6                        |
| California                      | 138             | 13.7                | 13.8              | 13.4                       |
| Colorado                        | 113             | 11.2                | 12.0              | 11.3                       |
| Idaho                           | 93              | 9.2                 | 9.2               | 9.0                        |
| Montana                         | 134             | 13.3                | 11.0              | 10.9                       |
| New Mexico                      | 105             | 10.4                | 11.0              | 4.4                        |
| Nevada                          | 33              | 3.3                 | 3.8               | 11.2                       |
| Oregon                          | 128             | 12.7                | 11.1              | 10.7                       |
| Utah                            | 55              | 5.5                 | 5.0               | 5.2                        |
| Washington                      | 116             | 11.5                | 12.0              | 11.8                       |
| Wyoming                         | 60              | 5.9                 | 6.0               | 6.5                        |

Notes: Population estimates taken from IPUMS National Historical Geographic Information System, ACS five-year estimates, 2014-2018.

Table A2: Informal social support participation across demographic groups (alternative specification)

|                                                   | Any Informal      | Food Bank       | Organization     | Network Receive   | Network Give      | Double Up       |
|---------------------------------------------------|-------------------|-----------------|------------------|-------------------|-------------------|-----------------|
| Intercept                                         | 0.40***<br>(0.07) | 0.00<br>(0.03)  | 0.02<br>(0.03)   | 0.13*<br>(0.05)   | 0.31***<br>(0.07) | 0.14*<br>(0.06) |
| Negative Financial Impact                         | 0.13**<br>(0.05)  | 0.04<br>(0.02)  | 0.05*<br>(0.02)  | 0.09**<br>(0.03)  | 0.06<br>(0.05)    | 0.00<br>(0.04)  |
| <b>Sex [Ref. = Male]</b>                          |                   |                 |                  |                   |                   |                 |
| Female                                            | 0.08<br>(0.04)    | 0.05*<br>(0.02) | 0.01<br>(0.02)   | 0.00<br>(0.03)    | 0.03<br>(0.04)    | 0.08*<br>(0.04) |
| Other or No Response (Sex)                        | 0.21<br>(0.17)    | 0.12<br>(0.14)  | 0.09<br>(0.14)   | -0.05<br>(0.11)   | 0.32<br>(0.19)    | -0.00<br>(0.16) |
| <b>Ethnicity [Ref. = Not Latino/a]</b>            |                   |                 |                  |                   |                   |                 |
| Latino/a                                          | 0.24***<br>(0.07) | 0.03<br>(0.04)  | -0.03<br>(0.02)  | 0.02<br>(0.05)    | 0.18*<br>(0.08)   | 0.13<br>(0.07)  |
| No Response (Ethnicity)                           | 0.04<br>(0.11)    | 0.03<br>(0.05)  | 0.04<br>(0.05)   | 0.02<br>(0.05)    | 0.03<br>(0.11)    | 0.01<br>(0.07)  |
| <b>Education [Ref. = Bachelors or Associates]</b> |                   |                 |                  |                   |                   |                 |
| Less than High School                             | 0.14<br>(0.12)    | 0.24<br>(0.15)  | 0.02<br>(0.06)   | 0.16<br>(0.13)    | 0.02<br>(0.16)    | 0.08<br>(0.14)  |
| High School or GED                                | -0.03<br>(0.06)   | 0.01<br>(0.03)  | -0.03*<br>(0.01) | 0.03<br>(0.04)    | -0.09<br>(0.05)   | -0.01<br>(0.05) |
| Some College                                      | -0.00<br>(0.05)   | 0.01<br>(0.02)  | 0.01<br>(0.02)   | 0.02<br>(0.03)    | -0.00<br>(0.05)   | 0.05<br>(0.04)  |
| Graduate or Professional Degree                   | 0.06<br>(0.05)    | -0.02<br>(0.02) | 0.02<br>(0.02)   | 0.02<br>(0.03)    | 0.05<br>(0.05)    | 0.05<br>(0.04)  |
| No Response (Education)                           | -0.34<br>(0.25)   | 0.01<br>(0.19)  | -0.15<br>(0.11)  | -0.06<br>(0.13)   | -0.20<br>(0.25)   | 0.07<br>(0.19)  |
| <b>Age [Ref. = 18-34]</b>                         |                   |                 |                  |                   |                   |                 |
| 35-49                                             | 0.01<br>(0.07)    | 0.03<br>(0.04)  | 0.01<br>(0.03)   | -0.10<br>(0.05)   | 0.05<br>(0.07)    | -0.02<br>(0.06) |
| 50-64                                             | 0.03<br>(0.07)    | -0.01<br>(0.04) | -0.03<br>(0.03)  | -0.12*<br>(0.05)  | 0.04<br>(0.07)    | -0.03<br>(0.06) |
| 65+                                               | -0.07<br>(0.07)   | -0.00<br>(0.04) | -0.02<br>(0.02)  | -0.14**<br>(0.05) | -0.06<br>(0.07)   | -0.08<br>(0.06) |
| No Response (Age)                                 | 0.02<br>(0.13)    | -0.02<br>(0.08) | -0.02<br>(0.08)  | -0.01<br>(0.09)   | -0.09<br>(0.13)   | -0.08<br>(0.10) |
| Num. obs.                                         | 1009              | 1009            | 1009             | 1009              | 1009              | 1009            |

\*\*\* $p < 0.001$ ; \*\* $p < 0.01$ ; \* $p < 0.05$

Table A3: Government safety net participation across demographic groups

|                                                   | Any Formal        | Medicaid        | Social Security    | SNAP            | Unemployment Benefits |
|---------------------------------------------------|-------------------|-----------------|--------------------|-----------------|-----------------------|
| Intercept                                         | 0.09<br>(0.06)    | 0.03<br>(0.04)  | -0.00<br>(0.03)    | -0.02<br>(0.03) | 0.10*<br>(0.04)       |
| Negative Financial Impact                         | 0.15***<br>(0.04) | 0.04<br>(0.03)  | 0.01<br>(0.03)     | 0.01<br>(0.03)  | 0.11**<br>(0.03)      |
| <b>Sex [Ref. = Male]</b>                          |                   |                 |                    |                 |                       |
| Female                                            | 0.08*<br>(0.04)   | 0.07*<br>(0.03) | 0.05<br>(0.03)     | 0.04<br>(0.03)  | 0.07*<br>(0.03)       |
| Other or No Response (Sex)                        | -0.07<br>(0.18)   | 0.05<br>(0.15)  | -0.04<br>(0.05)    | 0.01<br>(0.04)  | -0.12<br>(0.06)       |
| <b>Ethnicity [Ref. = Not Latino/a]</b>            |                   |                 |                    |                 |                       |
| Latino/a                                          | -0.02<br>(0.07)   | 0.06<br>(0.06)  | 0.05<br>(0.05)     | 0.14*<br>(0.06) | -0.09<br>(0.04)       |
| No Response (Ethnicity)                           | 0.01<br>(0.10)    | 0.12<br>(0.08)  | 0.02<br>(0.06)     | -0.01<br>(0.03) | -0.00<br>(0.06)       |
| <b>Education [Ref. = Bachelors or Associates]</b> |                   |                 |                    |                 |                       |
| Less than High School                             | 0.31*<br>(0.14)   | 0.12<br>(0.12)  | 0.20<br>(0.13)     | 0.24<br>(0.13)  | -0.00<br>(0.09)       |
| High School or GED                                | 0.04<br>(0.05)    | 0.01<br>(0.03)  | 0.02<br>(0.03)     | 0.03<br>(0.03)  | -0.02<br>(0.04)       |
| Some College                                      | 0.10*<br>(0.05)   | 0.06<br>(0.03)  | 0.03<br>(0.03)     | 0.06*<br>(0.03) | 0.01<br>(0.04)        |
| Graduate or Professional Degree                   | 0.04<br>(0.05)    | 0.04<br>(0.03)  | -0.04<br>(0.03)    | 0.02<br>(0.02)  | 0.01<br>(0.03)        |
| No Response (Education)                           | -0.23<br>(0.21)   | -0.12<br>(0.16) | -0.39***<br>(0.11) | -0.06<br>(0.08) | 0.22<br>(0.18)        |
| <b>Age [Ref. = 18-34]</b>                         |                   |                 |                    |                 |                       |
| 35-49                                             | 0.07<br>(0.07)    | -0.00<br>(0.05) | -0.01<br>(0.04)    | 0.05<br>(0.05)  | 0.02<br>(0.05)        |
| 50-64                                             | 0.06<br>(0.06)    | -0.05<br>(0.05) | 0.10*<br>(0.04)    | 0.00<br>(0.04)  | -0.04<br>(0.05)       |
| 65+                                               | 0.39***<br>(0.06) | -0.03<br>(0.05) | 0.54***<br>(0.05)  | -0.02<br>(0.04) | -0.11*<br>(0.05)      |
| No Response (Age)                                 | 0.34**<br>(0.13)  | -0.01<br>(0.10) | 0.41***<br>(0.11)  | 0.07<br>(0.07)  | -0.04<br>(0.08)       |
| Num. obs.                                         | 1009              | 1009            | 1009               | 1009            | 1009                  |

\*\*\*  $p < 0.001$ ; \*\*  $p < 0.01$ ; \*  $p < 0.05$

## Survey Instrument Questions

I am going to read you a list of aspects of life that have been impacted by the coronavirus pandemic. Using a 10-point scale, I'd like you to tell me how it has impacted that aspect of your life personally. On this scale, 1 is "extremely negative," 10 is "extremely positive," and 5 is no impact at all. Here is the first one ... (RANDOMIZE).

- Your life, overall
- Your household finances
- Your mental health
- Your physical health

During 2019, before the COVID-19 pandemic, were you employed? (IF YES: Was it full-time or part-time?) [IF NO: Would you say you were not employed in 2019 before the COVID-19 pandemic because you were: (READ CODES)]

- Yes, employed full-time
- Yes, employed part-time
- Retired
- A homemaker
- A student
- Temporarily unemployed
- Disabled
- Other
- (DON'T READ) DK/NA

During the past month, were you employed? (IF YES: Was it full-time or part-time?) [IF NO: Would you say you are not employed because you were: (READ CODES)]

- Yes, employed full-time
- Yes, employed part-time
- Unemployed due to COVID-19
- Unemployed due to other reasons
- Retired

- A homemaker
- A student
- Temporarily unemployed
- Disabled
- Other
- (DON'T READ) DK/NA

Next, here is a list of types of assistance. For each one I read, I'd like you to tell me whether you or anyone in your household received that type of assistance in 2019 before the coronavirus pandemic, whether they have received it in the past month, both, or neither. (RANDOMIZE)

- Financial support from family or friends
- Supplies from a food bank
- Financial support from community-based organizations or faith-based organizations
- Unemployment benefits
- Medicaid
- Social Security benefits
- SNAP or food stamps
- Section 8 Housing Choice Voucher
- Coronavirus stimulus check

Since the pandemic began, have other people moved in with you, like friends or family members? If so, how many? (RECORD VERBATIM NUMERIC RESPONSE)

Since the pandemic began, have you given any financial support to family or friends?

- Yes
- No
- (DON'T READ) DK/NA

What is your gender?

- Male

- Female
- Other
- Refused

Do you consider yourself white, black or African American, Asian, Native American, Pacific Islander, mixed race, or some other race?

- White
- Black/African American
- Asian
- Native American
- Pacific Islander
- Mixed Race
- Other
- (DON'T READ) DK/NA

What is the highest level of education you have completed?

- No high school diploma
- High school graduate
- Some college, no degree
- Two or four-year college degree
- Graduate degree
- (DON'T READ) DK/NA

What is your age?

- 2002-1996 (18-24)
- 1995-1991 (25-29)
- 1990-1986 (30-34)
- 1985-1981 (35-39)
- 1980-1976 (40-44)

- 1975-1971 (45-49)
- 1970-1966 (50-54)
- 1965-1961 (55-59)
- 1960-1956 (60-64)
- 1955-1946 (65-74)
- 1945 or earlier (75 & over)
- (DON'T READ) DK/NA

## Selected CPS-ASEC Variables

Descriptions of variables below taken directly from IPUMS CPS variable search webpage (IPUMS n.d.).

- “INCSS indicates how much pre-tax income (if any) the respondent received from Social Security or U.S. government Railroad Retirement insurance payments (for 1968-1979) or from Social Security payments exclusively (1980 forward).”
- “INCUNEMP indicates how much pre-tax income (if any) the respondent received from state or federal unemployment compensation, Supplemental Unemployment Benefits (SUB), or union unemployment or strike benefits during the previous calendar year.”
- “FOODSTAMP reports the family market value of food stamps –the Supplemental Nutrition Assistance Program (SNAP). “Family market value” refers to the total monetary value of food stamps received by a given family within the household. All members of the same family will have the same FOODSTAMP response.”
- “HIMCAIDLY indicates whether the respondent was covered by Medicaid during the previous calendar year.”
- “ASECWTH is a household-level weight that should be used to generate statistics about households in March Annual Social and Economic (ASEC) Supplement data. The CPS uses a complex stratified sampling scheme, and ASECWTH must be used to produce unbiased household-level statistics from the IPUMS-CPS ASEC data.”
- “METRO indicates whether a household was located in a metropolitan area.”

## Appendix References

IPUMS. n.d. “Search for Variables.” IPUMS CPS. Retrieved October 10, 2022 (<https://cps.ipums.org/cps-action/variables/search>).

U.S. Census Bureau. n.d. 2018: ACS 5-Year Estimates. American Community Survey.
